# Supplementary material for: DELE1 tracks perturbed protein import and processing in human mitochondria
Source: PubMed Central journal article supplement (PMC8986780; doi:10.1038/s41467-022-29479-y), 2022-04-06
Supplement: 41467_2022_29479_MOESM1_ESM.pdf [file 41467_2022_29479_MOESM1_ESM.pdf]

# SUPPLEMENTARY INFORMATION

## DELE1 tracks perturbed protein import and processing in human mitochondria

Evelyn Fessler<sup>1,\*</sup>, Luisa Krumwiede<sup>1</sup> & Lucas T. Jae<sup>1,\*</sup>

<sup>1</sup>Gene Center and Department of Biochemistry, Ludwig-Maximilians-Universität München, Feodor-Lynen-Strasse 25, 81377, Munich, Germany.

\*Evelyn Fessler [fessler@genzentrum.lmu.de](mailto:fessler@genzentrum.lmu.de)

\*Lucas T. Jae [jae@genzentrum.lmu.de](mailto:jae@genzentrum.lmu.de)

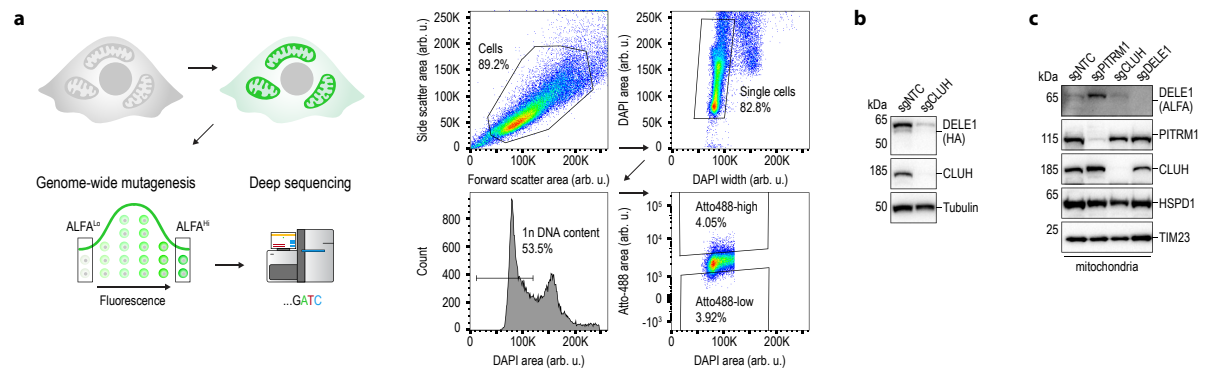

**Supplementary Figure 1. PITRM1 and CLUH regulate the levels of DELE1.**

**a** Schematic depicting work flow of haploid genetic screen for regulators of DELE1 and flow cytometry gating strategy. Arb. u., arbitrary units.

**b** HeLa *DELE1*<sup>HA</sup> cells exposed to the indicated sgRNAs were analyzed by immunoblotting.

**c** HAP1 *DELE1*<sup>ALFA</sup> cells were exposed to the specified sgRNAs. Mitochondria were isolated and DELE1 levels were analyzed by immunoblotting.

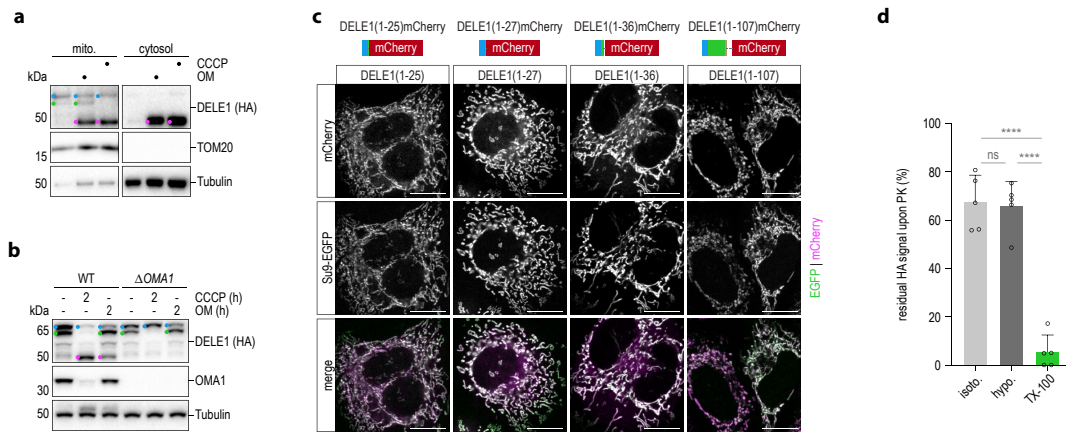

**Supplementary Figure 2. DELE1 gives rise to multiple protein species and contains a short presequence that promotes mitochondrial targeting.**

**a** 293T *DELE1*<sup>HA</sup> cells were treated with CCCP or OM for 6h followed by isolation of mitochondria (mito.). Localization of DELE1 species to mitochondria or the cytosol was analyzed by immunoblotting.

**b** 293T wild-type (WT) and OMA1 knockout ( $\Delta$ *OMA1*) cells stably expressing DELE1-HA were treated with CCCP or OM for 2h and DELE1 processing was analyzed by immunoblotting.

**c** HeLa cells were transiently transfected with the indicated constructs alongside Su9-EGFP and localization of mCherry and EGFP was analyzed by confocal microscopy in living cells. Scale bars, 10  $\mu$ m. EGFP (green), mCherry (pink).

**d** Quantification of the sensitivity of DELE1 to proteinase K under the respective buffer conditions (isotonic buffer (isoto.), osmotic swelling by hypotonic buffer (hypo.), or lysis with TX-100) in mitochondria isolated from HeLa *DELE1*<sup>HA</sup> cells. Graph depicts mean residual HA signal after exposure to proteinase K compared to untreated  $\pm$  s.d. of n=5 independent experiments. Statistical significance was assessed using ordinary one-way ANOVA with Tukey's multiple comparisons correction. \*\*\*\**P* < 0.0001, ns = 0.9703.

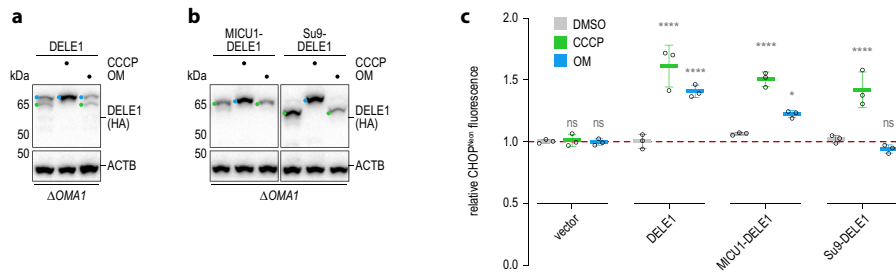

**Supplementary Figure 3. Behavior of different DELE1 proteins in the context of mitochondrial perturbations.**

**a, b** 293T OMA1 knockout ( $\Delta OMA1$ ) cells were transiently transfected with DELE1 (**a**) or the specified variant (**b**), treated as indicated for 6h and analyzed by immunoblotting.

**c** CHOP<sup>Neon</sup> fluorescence was analyzed by flow cytometry in HAP1 CHOP<sup>Neon</sup> DELE1 knockout cells upon transient transfection of the indicated constructs or empty vector together with mCherry and subsequent treatments for 8h. CHOP<sup>Neon</sup> fluorescence is shown as fold change vs. the respective untreated control (red line) and statistical significance of CCCP/OM-treated cells compared to DMSO controls was assessed using two-way ANOVA with Dunnett's multiple comparisons correction. Graph depicts mean  $\pm$  s.d. of n=3 independent experiments. ns, non-significant. \*\*\*\* $P < 0.0001$ , \* $P = 0.0266$ , ns  $\geq 0.3361$ .

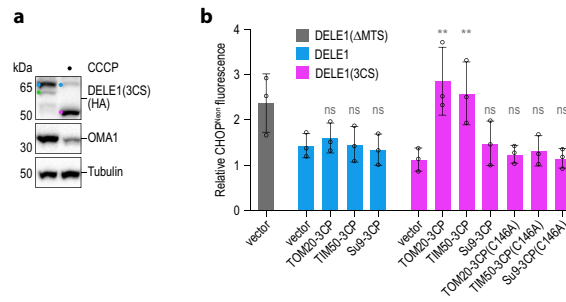

#### Supplementary Figure 4. Cleavage of DELE1 by OMA1 and 3C protease.

**a** HeLa wild-type cells were transiently transfected with DELE1(3CS) and empty vector control. 2h before harvest, cells were treated with DMSO or CCCP. Cleavage of the DELE1 protein was analyzed by immunoblotting.

**b** HAP1 CHOP<sup>Neon</sup>  $\Delta$ OMA1 cells were transiently transfected with the indicated constructs together with mCherry and CHOP<sup>Neon</sup> fluorescence was analyzed by flow cytometry. Relative CHOP<sup>Neon</sup> fluorescence to empty vector transfected cells is shown. Graph depicts mean  $\pm$  s.d. of n=3 independent experiments. DELE1( $\Delta$ MTS) serves as control. Statistical significance within DELE1 constructs compared to the respective vector control was assessed by ordinary one-way ANOVA and Dunnett's multiple comparisons correction. DELE1: ns  $\geq$  0.8711; DELE1(3CS): \*\*P = 0.0025 (TOM20-3CP), \*\*P = 0.0093 (TIM50-3CP), ns  $\geq$  0.8567.

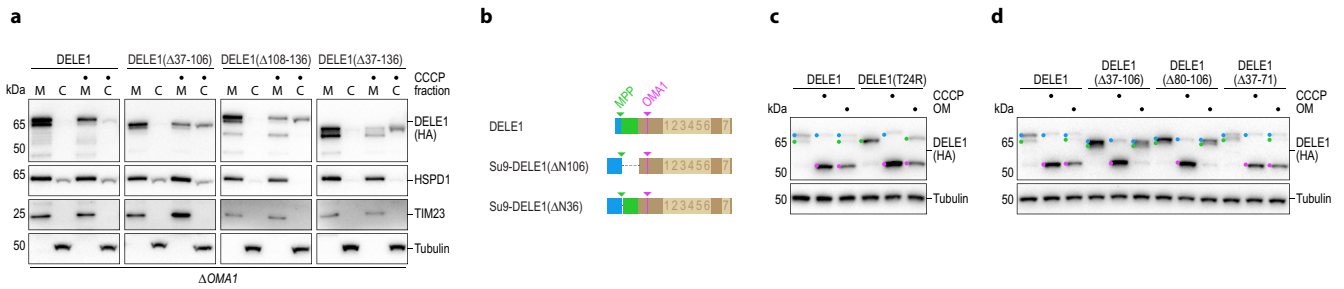

**Supplementary Figure 5. Effect of cis elements in the DELE1 MTS in stressed mitochondria.**

**a** HeLa  $\Delta OMA1$  cells stably expressing the indicated MTS variants were treated with CCCP for 2h and localization of DELE1 was analyzed by subcellular fractionation. M, mitochondria. C, cytosol.

**b** Schematic depicting DELE1 variants used in Fig. 5e with only the DELE1 presequence or the entire MTS replaced by the sorting signals of Su9.

**c, d** 293T  $\Delta DELE1$  cells were transiently transfected with the indicated constructs, treated with CCCP or OM for 4h and assayed for DELE1 cleavage by immunoblotting. DELE1( $\Delta 37-71$ ) lacks the portion of the MTS immediately adjacent to the presequence but contains the critical stretch between amino acids 80 and 106.

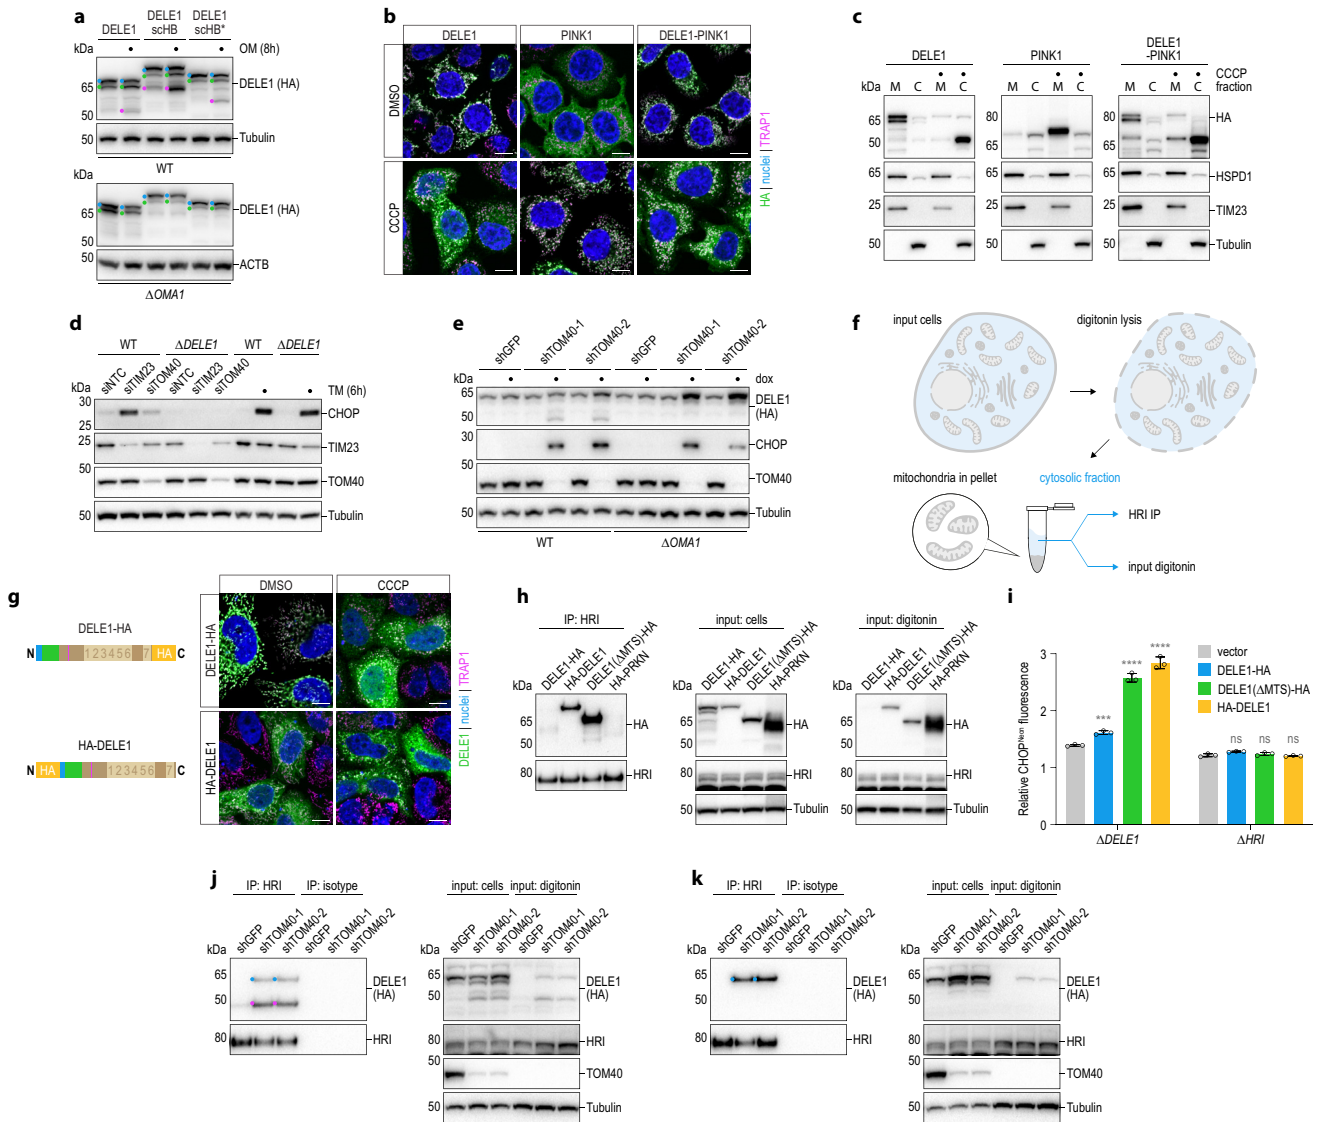

### Supplementary Figure 6. Response of DELE1 to different types of mitochondrial protein import stress.

**a** HeLa wild-type (top) or  $\Delta OMA1$  cells (bottom) were transiently transfected with the specified DELE1 variants and treated as indicated. Processing of the DELE1 protein was analyzed by immunoblotting; scHB, *Saccharomyces cerevisiae* heme-binding domain. scHB\*, destabilized HB domain. **b** HeLa cells stably expressing the indicated constructs were treated with CCCP for 4h and localization of HA-tagged proteins was analyzed by confocal microscopy. Scale bars, 10  $\mu$ m. Nuclei (DAPI, blue), mitochondria (TRAP1, pink), HA (green). **c** 293T cells stably expressing the indicated constructs were treated as in Fig. 6c and analyzed by subcellular fractionation. M, mitochondria. C, cytosol. **d** 293T WT and DELE1 knockout ( $\Delta DELE1$ ) cells were transfected with the indicated siRNAs and CHOP levels were analyzed 4 days post transfection or after 6h of tunicamycin (TM) treatment by immunoblotting. **e** TOM40 depletion was induced in HeLa  $DELE1^{HA}$  WT and OMA1 knockout ( $\Delta OMA1$ ) cells with doxycycline (dox) for 6 days and CHOP induction was analyzed by immunoblotting. **f** Schematic depicting lysis procedure for immunoprecipitations using digitonin to specifically analyze protein-protein interactions that take place in the cytosol. **g** HeLa cells were transiently transfected with DELE1 tagged N- or C-terminally with HA and localization was analyzed by confocal microscopy. Scale bars, 10  $\mu$ m. Nuclei (DAPI, blue), mitochondria (TRAP1, pink), DELE1 (HA, green). **h** Transient expression of the indicated constructs in 293T  $\Delta OMA1$  cells followed by cell lysis using digitonin as detergent. Cytosolic DELE1 species were able to co-precipitate with endogenous HRI as analyzed by immunoblotting. PRKN was used as negative control. **i** Cytosolic DELE1 species can induce CHOP<sup>Neon</sup> fluorescence in HAP1 CHOP<sup>Neon</sup> DELE1 knockout ( $\Delta DELE1$ ) but not HRI knockout ( $\Delta HRI$ ) cells. Cells were transiently transfected with the indicated constructs alongside mCherry and CHOP<sup>Neon</sup> fluorescence was analyzed 32h after transfection by flow cytometry. Mean  $\pm$  s.d. of n=3 independent biological samples (two-way ANOVA with Tukey's multiple comparisons correction). \*\*\* $P = 0.0008$ , \*\*\*\* $P < 0.0001$ , ns  $\geq 0.7528$ . **j, k** TOM40 knockdown by two different shRNAs was induced in HeLa  $DELE1^{HA}$  OMA1-proficient (**j**) or OMA1-deficient (**k**) cells for 5 days (shGFP serves as control). Cells were lysed with the digitonin detergent and the co-precipitation of cytosolic DELE1 species with endogenous HRI was analyzed by immunoblotting.

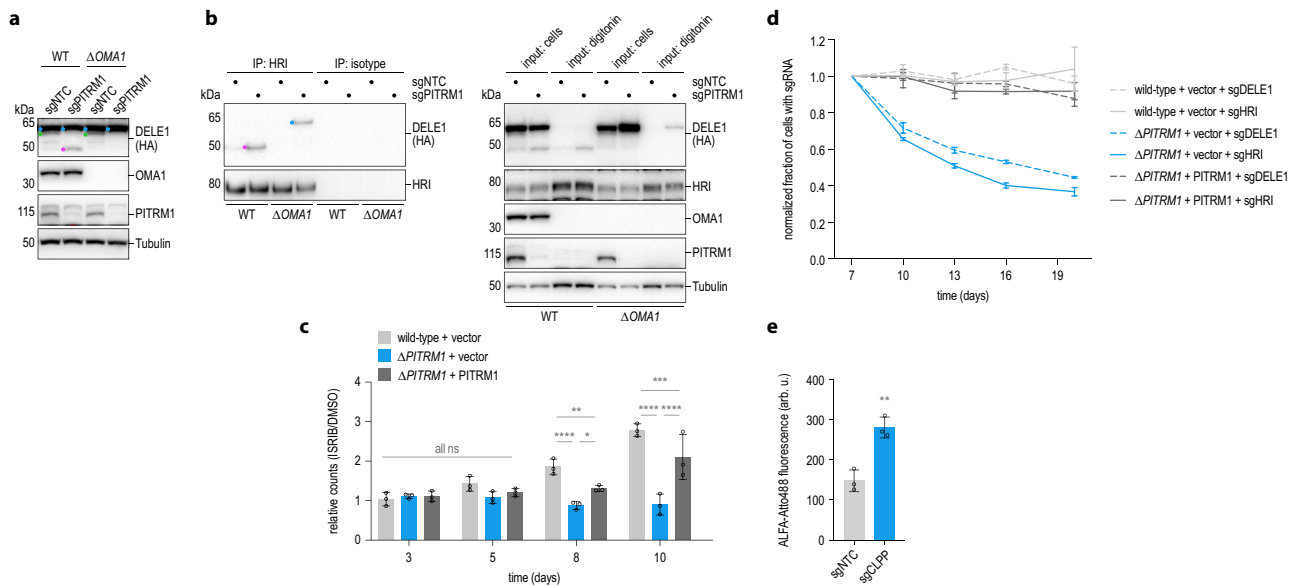

### Supplementary Figure 7. ISR signaling in PITRM1 knockout cells promotes cellular fitness.

**a** HeLa *DELE1*<sup>HA</sup> cells were treated as in Fig. 7a and analyzed for DELE1 processing by immunoblotting.

**b** HeLa *DELE1*<sup>HA</sup> cells proficient or deficient for OMA1 were exposed to the indicated sgRNAs and assayed for interaction of endogenous HRI with cytosolic DELE1 species by digitonin lysis as in Supplementary Fig. 6j, k.

**c** HAP1 *DELE1*<sup>ALFA</sup> cells of the indicated genotypes were cultured in medium containing ISRIB or DMSO. Cells were passaged and counted as indicated. Mean ± s.d. of n=3 independent biological replicates (separately seeded and cultured wells for each genotype and treatment) is shown. Statistical significance was assessed using two-way ANOVA with Tukey's multiple comparisons correction. Day 3: ns ≥ 0.8807; Day 5: ns ≥ 0.0983; Day 8: \*\*\*\*P < 0.0001, \*\*P = 0.0057, \*P = 0.0331; Day 10: \*\*\*\*P < 0.0001, \*\*\*P = 0.0007.

**d** HAP1 *DELE1*<sup>ALFA</sup> cells of the indicated genotypes were infected with lentivirus encoding sgRNAs directed at the specified genes or a non-targeting control together with tRFP. The percentage of tRFP-positive, sgDELE1 or sgHRI-containing cells was normalized to the non-targeting control and to day 7 for each cell line and followed over time. Mean ± s.d. of n=3 independent biological replicates (separately cultured wells for each sgRNA and genotype) is shown.

**e** DELE1 levels in HAP1 *DELE1*<sup>ALFA</sup> cells exposed to the indicated sgRNAs were analyzed by flow cytometry. Graph depicts mean ± s.d. of n=3 independent biological samples. Significance was assessed using a two-tailed Student's *t*-test. \*\*P = 0.0036. Arb. u., arbitrary units.



### Supplementary Table 1. Oligonucleotides.

Table of oligonucleotides in 5' to 3' orientation. NTC, non-targeting control; sgRNA, single guide RNA; shRNA short hairpin RNA.

| Target        | Number | Sequence (5' to 3')                                       |
|---------------|--------|-----------------------------------------------------------|
| altMIEF       | C872.5 | AAACAATTGGCCACCATGGCCCCGTGGAGCCGAG                        |
| altMIEF       | C873.3 | TTTGGATCCAATGATCCTCCCAATTTGCCGTTGAG                       |
| CLPP sgRNA    | S569.5 | CACCGCAGGGCTGTTGATGTACATG                                 |
| CLPP sgRNA    | S570.3 | AAACCATGTACATCAACAGCCCTGC                                 |
| CLUH sgRNA    | S346.5 | CACCGATCAGTCATGCTCTTAAACG                                 |
| CLUH sgRNA    | S347.3 | AAACCGTTTAAGAGCATGACTGATC                                 |
| DELE1         | C372.5 | TAGGAATTCGCCACCATGTGGCGCCTCCCGGG                          |
| DELE1         | C373.3 | CTTGGATCCGCCAAAACCTAGTCTTACAACACTC                        |
| DELE1 sgRNA   | S340.5 | CACCGAGCGACATGTGGCGCCTCCC                                 |
| DELE1 sgRNA   | S341.3 | AAACGGGAGGCGCCACATGTGCGCTC                                |
| DELE1 sgRNA   | S372.5 | CACCGTGCCCGCTCTGGCCCCTAAG                                 |
| DELE1 sgRNA   | S373.3 | AAACCTTAGGGGCCAGAGCGGGCAC                                 |
| DELE1 sgRNA   | S416.5 | CACCGCTTACAACACTCCTTTCCAG                                 |
| DELE1 sgRNA   | S417.3 | AAACCTGGAAAGGAGTGTGTAAGC                                  |
| DELE1 sgRNA   | S659.5 | CACCGCAGTAGTAGCATCGAGTCCG                                 |
| DELE1 sgRNA   | S660.3 | AAACCGGACTCGATGCTACTACTGC                                 |
| EIF2AK1 sgRNA | S342.5 | CACCGCCATCGACTTTCCCGCCGA                                  |
| EIF2AK1 sgRNA | S343.3 | AAACTCGCGGGAAAGTCGATGGC                                   |
| GFP shRNA     | S810.5 | CCGGCTATATCATGGCCGACAAGCACTCGAGTGCTTGTGCGCCATGATATAGTTTTG |
| GFP shRNA     | S811.3 | AATTCAAAACTATATCATGGCCGACAAGCACTCGAGTGCTTGTGCGCCATGATATAG |
| IMMP1L sgRNA  | S477.5 | CACCGAGTATAGCCAACAAGTCGAA                                 |
| IMMP1L sgRNA  | S478.3 | AAACTTCGACTTGTGGCTATACTC                                  |
| IMMP2L sgRNA  | S479.5 | CACCGCTTGGATCGGGTCGCCTGTG                                 |
| IMMP2L sgRNA  | S480.3 | AAACCACAGGCGACCCGATCCAAGC                                 |
| MICU1         | C654.5 | AAAGAATTCGCCACCATGTTTCGTCTGAACTCACTTTCTGCTTTGG            |
| MICU1         | C655.3 | TTTGGATCCAGCGGCTGGAGATTCTGCATGGGCCCTCTTCC                 |
| NTC sgRNA     | S273.5 | CACCGCCAGTACCCAAAAAGCGGG                                  |
| NTC sgRNA     | S274.3 | AAACCCCGCTTTTTGGGTAAGTGGC                                 |
| NTC sgRNA     | S81.5  | CACCGGTATGTGCGGAACCTCTCC                                  |
| NTC sgRNA     | S82.3  | AAACGGAGAGGTTCCCGACATACC                                  |
| OMA1 sgRNA    | S344.5 | CACCGACCGGAGCAGCTTGAAACCG                                 |
| OMA1 sgRNA    | S345.3 | AAACCGGTTTCAAGCTGCTCCGGTC                                 |
| OPA1          | C817.5 | TTTGAATTCGCCACCATGTGGCGACTACGTCGG                         |
| OPA1          | C818.3 | TTTGGATCCTGACACCTTTCTAAAATGCTTGTAC                        |
| PITRM1        | C780.5 | TATGCTAGCAATTGGCCACCATGTGGCGCTGCGGGCGGGCGG                |
| PITRM1        | C781.3 | TATGGATCCTTGGATGATCCAGGATGGGTCTTGGC                       |
| PITRM1 sgRNA  | S571.5 | CACCGAGGAGCCAGGTATTTACACC                                 |
| PITRM1 sgRNA  | S572.3 | AAACGGTGTAATACCTGGCTCCTC                                  |
| PMPCB sgRNA   | S475.5 | CACCGAACAGATTAAGAAGTACAC                                  |
| PMPCB sgRNA   | S476.3 | AAACGTGTACTTCTTAATCTGTTC                                  |
| SEC13         | C218.5 | TTTGAATTCGCCACCATGGTGTGAGTAATTAACACTGTGGATACC             |
| SEC13         | C219.3 | TTTAAGCTTCTGCTCGTTCTGCTGGCCCTCTGT                         |
| TIM50         | C652.5 | AAAGAATTCGCCACCATGGCGCCCTCGGCAGCGGTGTTCC                  |
| TIM50         | C653.3 | AAAGGATCCGCCGCCAGACCCACCTCCGGGCTGTTTGGAGCGAGGCCACAAGC     |
| TOM20         | C194.5 | TTTGAATTCGCCACCATGGTGGTTCGGAACAGCGCC                      |
| TOM20         | C195.3 | TCAGAAGACTAAGCTTTTCCACATCATCTTCAGCCAAGC                   |

**Supplementary Table 2. Antibodies used in this study.**

Table of antibodies used in this study with catalogue (cat.) numbers, vendors, applications and dilutions. FACS, flow cytometry; WB, Western blot; IF, immunofluorescence; IP, immunoprecipitation.

| Antigen                                    | Cat. number       | Vendor                   | Application | Dilution       |
|--------------------------------------------|-------------------|--------------------------|-------------|----------------|
| FluoTag®-X2 anti-ALFA Atto488              | N1502-At488-500µL | NanoTag                  | FACS        | 1:500          |
| FluoTag®-X2 anti-ALFA for Western Blotting | N1502-HRP         | NanoTag                  | WB          | 1:500          |
| Chop                                       | 2895T             | CST                      | WB          | 1:1000         |
| FLAG                                       | F7425             | Sigma-Aldrich            | WB          | 1:1000         |
| HA                                         | 901514            | BioLegend                | WB, IF      | 1:1000, 1:500  |
| PITRM1                                     | 10101-2-AP        | ProteinTech              | WB          | 1:1000         |
| CLUH / eIF3X                               | NB100-93306       | Novus Biologicals        | WB          | 1:2000         |
| PMPCB                                      | 16064-1-A         | ProteinTech              | WB          | 1:1000         |
| OMA1                                       | 95473S            | CST                      | WB          | 1:1000         |
| EIF2AK1                                    | 20499-1-AP        | ProteinTech              | WB, IP      | 1:1000, 1:1000 |
| alpha Tubulin                              | 66031-1-Ig        | ProteinTech              | WB          | 1:10000        |
| HSPD1                                      | 12165             | CST                      | WB          | 1:1000         |
| TRAP1                                      | 92345             | CST                      | WB, IF      | 1:1000, 1:200  |
| TIM23                                      | sc-514463         | SantaCruz                | WB          | 1:1000         |
| TOMM40                                     | 18409-1-AP        | ProteinTech              | WB          | 1:2000         |
| Tom20                                      | sc-17764          | SantaCruz                | WB          | 1:500          |
| Smac/Diablo                                | 15108             | CST                      | WB          | 1:1000         |
| β-actin-HRP (ACTB)                         | sc-47778          | SantaCruz                | WB          | 1:3000         |
| GAPDH                                      | 60004-1-Ig        | ProteinTech              | WB          | 1:50000        |
| mCherry                                    | 26765-1-AP        | ProteinTech              | IP          | 1:1150         |
| Goat-anti-Mouse IgG-HRP                    | 170-6516          | BioRad                   | WB          | 1:3000         |
| Goat-anti-Rabbit IgG-HRP                   | 170-6515          | BioRad                   | WB          | 1:3000         |
| Alexa Fluor 488-labeled Goat anti-mouse    | A11001            | Thermo Fisher Scientific | IF          | 1:500          |
| Alexa Fluor 568-labeled Goat anti-rabbit   | A11036            | Thermo Fisher Scientific | IF          | 1:500          |
