# Supplementary material for: DELE1 tracks perturbed protein import and processing in human mitochondria
Source: PubMed Central journal article supplement (PMC8986780; doi:10.1038/s41467-022-29479-y), 2022-04-06
Supplement: 41467_2022_29479_MOESM5_ESM.pdf [file 41467_2022_29479_MOESM5_ESM.pdf]

## Reporting Summary

Nature Portfolio wishes to improve the reproducibility of the work that we publish. This form provides structure for consistency and transparency in reporting. For further information on Nature Portfolio policies, see our [Editorial Policies](#) and the [Editorial Policy Checklist](#).

### Statistics

For all statistical analyses, confirm that the following items are present in the figure legend, table legend, main text, or Methods section.

n/a Confirmed

- |                                     |                                     |                                                                                                                                                                                                                                                            |
|-------------------------------------|-------------------------------------|------------------------------------------------------------------------------------------------------------------------------------------------------------------------------------------------------------------------------------------------------------|
| <input type="checkbox"/>            | <input checked="" type="checkbox"/> | The exact sample size ( $n$ ) for each experimental group/condition, given as a discrete number and unit of measurement                                                                                                                                    |
| <input type="checkbox"/>            | <input checked="" type="checkbox"/> | A statement on whether measurements were taken from distinct samples or whether the same sample was measured repeatedly                                                                                                                                    |
| <input type="checkbox"/>            | <input checked="" type="checkbox"/> | The statistical test(s) used AND whether they are one- or two-sided<br><i>Only common tests should be described solely by name; describe more complex techniques in the Methods section.</i>                                                               |
| <input checked="" type="checkbox"/> | <input type="checkbox"/>            | A description of all covariates tested                                                                                                                                                                                                                     |
| <input type="checkbox"/>            | <input checked="" type="checkbox"/> | A description of any assumptions or corrections, such as tests of normality and adjustment for multiple comparisons                                                                                                                                        |
| <input type="checkbox"/>            | <input checked="" type="checkbox"/> | A full description of the statistical parameters including central tendency (e.g. means) or other basic estimates (e.g. regression coefficient) AND variation (e.g. standard deviation) or associated estimates of uncertainty (e.g. confidence intervals) |
| <input type="checkbox"/>            | <input checked="" type="checkbox"/> | For null hypothesis testing, the test statistic (e.g. $F$ , $t$ , $r$ ) with confidence intervals, effect sizes, degrees of freedom and $P$ value noted<br><i>Give <math>P</math> values as exact values whenever suitable.</i>                            |
| <input checked="" type="checkbox"/> | <input type="checkbox"/>            | For Bayesian analysis, information on the choice of priors and Markov chain Monte Carlo settings                                                                                                                                                           |
| <input checked="" type="checkbox"/> | <input type="checkbox"/>            | For hierarchical and complex designs, identification of the appropriate level for tests and full reporting of outcomes                                                                                                                                     |
| <input checked="" type="checkbox"/> | <input type="checkbox"/>            | Estimates of effect sizes (e.g. Cohen's $d$ , Pearson's $r$ ), indicating how they were calculated                                                                                                                                                         |

*Our web collection on [statistics for biologists](#) contains articles on many of the points above.*

### Software and code

Policy information about [availability of computer code](#)

Data collection

For data collection the following software was used: BD FACSDiva 8.0.1 and 8.0.2, LasX 3.7.0.20979, ZEN 2009 5,5,0,443, Image Lab 5.2, SPARKCONTROL v3.1

Data analysis

Calculations of statistical significance were performed using GraphPad Prism version 9.3.0. For data analysis the following software was used: FlowJo 10.8, BD FACSDiva 8.0.1 and 8.0.2, GraphPad Prism 9.3.0, Image Lab version 6.1.0, Fiji 2.0.0-rc-69/1.52p, Bowtie 1.0.1, intersectBED v2.26.0, UniProt/clustalo 1.2.4

For manuscripts utilizing custom algorithms or software that are central to the research but not yet described in published literature, software must be made available to editors and reviewers. We strongly encourage code deposition in a community repository (e.g. GitHub). See the Nature Portfolio [guidelines for submitting code & software](#) for further information.

### Data

Policy information about [availability of data](#)

All manuscripts must include a [data availability statement](#). This statement should provide the following information, where applicable:

- Accession codes, unique identifiers, or web links for publicly available datasets
- A description of any restrictions on data availability
- For clinical datasets or third party data, please ensure that the statement adheres to our [policy](#)

The data supporting the findings of this study are available in the article and its supplementary information. Source data are provided with this paper. Original immunoblot images and plot data generated in this study are provided in the Source Data file. Sequencing datasets have been deposited at the NCBI Sequence Read Archive under the accession code PRJNA750901 [<https://www.ncbi.nlm.nih.gov/sra/?term=PRJNA750901>] and are publicly available. The corresponding processed

## Field-specific reporting

Please select the one below that is the best fit for your research. If you are not sure, read the appropriate sections before making your selection.

- Life sciences     Behavioural & social sciences     Ecological, evolutionary & environmental sciences

For a reference copy of the document with all sections, see [nature.com/documents/nr-reporting-summary-flat.pdf](https://www.nature.com/documents/nr-reporting-summary-flat.pdf)

## Life sciences study design

All studies must disclose on these points even when the disclosure is negative.

|                 |                                                                                                                                                                                                                                                                                                                                                                                                                                                                                                                                                                                                                                                                                                                                                                                                                                                                                                                                                                                                                                                                                                                                                                                                                                                                                                                                                                                                                                                                                                                                                                                                                                                                                                                                                                                                                                                                                                                                                                                                                                                                                                                                       |
|-----------------|---------------------------------------------------------------------------------------------------------------------------------------------------------------------------------------------------------------------------------------------------------------------------------------------------------------------------------------------------------------------------------------------------------------------------------------------------------------------------------------------------------------------------------------------------------------------------------------------------------------------------------------------------------------------------------------------------------------------------------------------------------------------------------------------------------------------------------------------------------------------------------------------------------------------------------------------------------------------------------------------------------------------------------------------------------------------------------------------------------------------------------------------------------------------------------------------------------------------------------------------------------------------------------------------------------------------------------------------------------------------------------------------------------------------------------------------------------------------------------------------------------------------------------------------------------------------------------------------------------------------------------------------------------------------------------------------------------------------------------------------------------------------------------------------------------------------------------------------------------------------------------------------------------------------------------------------------------------------------------------------------------------------------------------------------------------------------------------------------------------------------------------|
| Sample size     | No sample size calculation was performed, as the study does not involve animals or human subjects. Sample sizes were chosen based on previous experience and common practice in the field. Individual specimen correspond to culture wells that contain thousands to millions of single cells. For the haploid genetic screen a total of $n=2.4 \times 10^7$ single cells were analyzed. Flow cytometry experiments included $n=3$ biological replicates. Experiments were independently reproduced as detailed in the 'Methods' section and below.                                                                                                                                                                                                                                                                                                                                                                                                                                                                                                                                                                                                                                                                                                                                                                                                                                                                                                                                                                                                                                                                                                                                                                                                                                                                                                                                                                                                                                                                                                                                                                                   |
| Data exclusions | No data were excluded.                                                                                                                                                                                                                                                                                                                                                                                                                                                                                                                                                                                                                                                                                                                                                                                                                                                                                                                                                                                                                                                                                                                                                                                                                                                                                                                                                                                                                                                                                                                                                                                                                                                                                                                                                                                                                                                                                                                                                                                                                                                                                                                |
| Replication     | All experiments were independently repeated and were reliably reproduced. Additionally, multiple cell lines were used to confirm reproducibility of the findings. For the haploid genetic screen (Fig. 1f) a total of $n=2.4 \times 10^7$ single cells were analyzed. Data are representative of the following numbers of independent experiments: Fig. 1a, $n=2$ ; Fig. 1c, $n=3$ ; Fig. 1d, $n=3$ ; Fig. 1e, $n=3$ ; Fig. 1g, $n=3$ ; Fig. 1h, $n=4$ ; Fig. 1i, $n=3$ ; Fig. 1j, $n=2$ ; Fig. 1k, $n=2$ ; Fig. 2a, $n=2$ ; Fig. 2b, $n=3$ ; Fig. 2c, $n=3$ ; Fig. 2e, $n=3$ ; Fig. 2f, $n=2$ ; Fig. 2i, $n=2$ ; Fig. 2j, $n=3$ ; Fig. 2k, $n=3$ ; Fig. 2l, $n=5$ ; Fig. 3a, $n=3$ ; Fig. 3b, $n=3$ ; Fig. 3c, $n=3$ ; Fig. 3e, $n=3$ ; Fig. 3f, $n=2$ ; Fig. 3g, $n=3$ ; Fig. 4b, $n=3$ ; Fig. 4c-d, $n=3$ ; Fig. 4e, $n=5$ ; Fig. 4f, $n=4$ ; Fig. 5b, $n=2$ ; Fig. 5c, $n=2$ ; Fig. 5d, $n=3$ ; Fig. 5e, $n=3$ ; Fig. 5f, $n=3$ ; Fig. 5g, $n=3$ ; Fig. 6a, $n=3$ ; Fig. 6b, $n=3$ ; Fig. 6c, $n=2$ ; Fig. 6d, $n=4$ (d3), $n=2$ (d5); Fig. 6e, $n=3$ (d3), $n=4$ (d4); Fig. 7a, $n=3$ ; Fig. 7b, $n=2$ ; Fig. 7c, $n=4$ ; Fig. 7d, $n=4$ ; Fig. 7e, $n=3$ ; Fig. 7f, $n=2$ ; Fig. 7g, $n=4$ ; Supplementary Fig. 1b, $n=3$ ; Supplementary Fig. 1c, $n=2$ ; Supplementary Fig. 2a, $n=3$ ; Supplementary Fig. 2b, $n=4$ ; Supplementary Fig. 2c, $n=2$ ; Supplementary Fig. 2d, $n=5$ ; Supplementary Fig. 3a, $n=2$ ; Supplementary Fig. 3b, $n=2$ ; Supplementary Fig. 3c, $n=3$ ; Supplementary Fig. 4a, $n=3$ ; Supplementary Fig. 4b, $n=3$ ; Supplementary Fig. 5a, $n=2$ ; Supplementary Fig. 5c, $n=3$ ; Supplementary Fig. 5d, $n=3$ ; Supplementary Fig. 6a, $n=2$ ; Supplementary Fig. 6b, $n=3$ ; Supplementary Fig. 6c, $n=3$ ; Supplementary Fig. 6d, $n=2$ ; Supplementary Fig. 6e, $n=2$ ; Supplementary Fig. 6g, $n=2$ ; Supplementary Fig. 6h, $n=2$ ; Supplementary Fig. 6i, $n=3$ ; Supplementary Fig. 6j, $n=2$ ; Supplementary Fig. 6k, $n=2$ ; Supplementary Fig. 7a, $n=4$ ; Supplementary Fig. 7b, $n=4$ ; Supplementary Fig. 7c, $n=2$ ; Supplementary Fig. 7d, $n=4$ ; Supplementary Fig. 7e, $n=2$ . |
| Randomization   | Randomization was not relevant to this study, all tests were in-vitro. Cells were clearly identified based on genotype and/or treatment. Cells were cultured under identical conditions and unbiasedly allocated to well positions and treatments. Samples were harvested, processed and analyzed in random order when possible.                                                                                                                                                                                                                                                                                                                                                                                                                                                                                                                                                                                                                                                                                                                                                                                                                                                                                                                                                                                                                                                                                                                                                                                                                                                                                                                                                                                                                                                                                                                                                                                                                                                                                                                                                                                                      |
| Blinding        | Blinding was not relevant to this study, as all tests were in-vitro and no subjective rating of data was performed. Experimental conditions were typically evident from the data and parameters such as location of well positions is fixed. Key observations of microscopy-based assays were orthogonally analyzed by quantitative methods that report population averages (e.g. fractionation, flow cytometry).                                                                                                                                                                                                                                                                                                                                                                                                                                                                                                                                                                                                                                                                                                                                                                                                                                                                                                                                                                                                                                                                                                                                                                                                                                                                                                                                                                                                                                                                                                                                                                                                                                                                                                                     |

## Reporting for specific materials, systems and methods

We require information from authors about some types of materials, experimental systems and methods used in many studies. Here, indicate whether each material, system or method listed is relevant to your study. If you are not sure if a list item applies to your research, read the appropriate section before selecting a response.

### Materials & experimental systems

| n/a                                 | Involved in the study                                     |
|-------------------------------------|-----------------------------------------------------------|
| <input type="checkbox"/>            | <input checked="" type="checkbox"/> Antibodies            |
| <input type="checkbox"/>            | <input checked="" type="checkbox"/> Eukaryotic cell lines |
| <input checked="" type="checkbox"/> | <input type="checkbox"/> Palaeontology and archaeology    |
| <input checked="" type="checkbox"/> | <input type="checkbox"/> Animals and other organisms      |
| <input checked="" type="checkbox"/> | <input type="checkbox"/> Human research participants      |
| <input checked="" type="checkbox"/> | <input type="checkbox"/> Clinical data                    |
| <input checked="" type="checkbox"/> | <input type="checkbox"/> Dual use research of concern     |

### Methods

| n/a                                 | Involved in the study                              |
|-------------------------------------|----------------------------------------------------|
| <input checked="" type="checkbox"/> | <input type="checkbox"/> ChIP-seq                  |
| <input type="checkbox"/>            | <input checked="" type="checkbox"/> Flow cytometry |
| <input checked="" type="checkbox"/> | <input type="checkbox"/> MRI-based neuroimaging    |

## Antibodies

### Antibodies used

Antibodies used in this study are listed in Supplementary Table S2.  
 antigen | clone number | cat. number | lot number | vendor | application | dilution  
 FluoTag®-X2 anti-ALFA Atto488 | 1G5 | N1502-At488-500µL | 15190101 | NanoTag | FACS | 1:500  
 FluoTag®-X2 anti-ALFA for Western Blotting | 1G5 | N1502-HRP | 15200103 | NanoTag | WB | 1:500

Chop | L63F7 | 2895T | 12 | CST | WB | 1:1000  
 FLAG | - | F7425 | 086M4803V | Sigma-Aldrich | WB | 1:1000  
 HA | 16B12 | 901514 | n/a | BioLegend | WB, IF | 1:1000, 1:500  
 PITRM1 | - | 10101-2-AP | ProteinTech | WB | 1:1000  
 CLUH / eIF3X | NB100-93306 | - | Novus Biologicals | WB | 1:2000  
 PMPCB | - | 16064-1-A | - | ProteinTech | WB | 1:1000  
 OMA1 | D4J7K | 95473S | 1 | CST | WB | 1:1000  
 EIF2AK1 | - | 20499-1-AP | 00013826 | ProteinTech | WB, IP | 1:1000, 1:1000  
 alpha Tubulin | 1E4C11 | 66031-1-Ig | - | ProteinTech | WB | 1:10000  
 Smac/Diablo | D5S3R | 15108 | 1 | CST | WB | 1:1000  
 HSPD1 | D6F1 | 12165 | 3 | CST | WB | 1:1000  
 mNEON | 32F6 | 32f6-10 | 70117021AB | Chromotek | FACS | 1:2500  
 TRAP1 | D3D7N | 92345 | 1 | CST | WB, IF | 1:1000, 1:200  
 TIM23 | H-8 | sc-514463 | B0717 | SantaCruz | WB | 1:1000  
 TOMM40 | - | 18409-1-AP | - | ProteinTech | WB | 1:2000  
 TOM20 | F-10 | sc-17764 | J1218 | SantaCruz | WB | 1:500  
 β-actin-HRP (ACTB) | C4 | sc-47778 | K1418 | SantaCruz | WB | 1:3000  
 GAPDH | 1E6D9 | 60004-1-Ig | - | ProteinTech | WB | 1:50000  
 mCherry | - | 26765-1-AP | - | ProteinTech | IP | 1:1150  
 Goat-anti-Mouse IgG-HRP | - | 170-6516 | n/a | BioRad | WB | 1:3000  
 Goat-anti-Rabbit IgG-HRP | - | 170-6515 | n/a | BioRad | WB | 1:3000  
 Alexa Fluor 488-labeled Goat anti-mouse | - | A11001 | 1834337 | Thermo Fisher Scientific | FACS, IF | 1:500  
 Alexa Fluor 568-labeled Goat anti-rabbit | - | A11036 | 1832035 | Thermo Fisher Scientific | IF | 1:500

## Validation

For immunoblot analysis, the correct size of the protein of interest was assessed by protein marker and for microscopy, the localization of the stained protein was assessed.

The specificity of the following antibodies was tested using knockout/knockdown cell lines:

OMA1 (CST 95473S)  
 TRAP1 (CST 92345)  
 PITRM1 (ProteinTech 10101-2-AP)  
 CLUH / eIF3X (Novus Biologicals NB100-93306)  
 PMPCB (ProteinTech 16064-1-A)  
 TIM23 (SantaCruz sc-514463)  
 TOM40 (ProteinTech 18409-1-AP)

The anti EIF2AK1 antibody (ProteinTech 20499-1-AP) was used for immunoprecipitation of endogenous HRI protein; the identity of the precipitated proteins was assessed by mass-spectrometry, identifying EIF2AK1 among the most abundant proteins.

For validation by the manufacturer please see the following websites:

ALFA <https://nano-tag.com/products/fluotag-x2-anti-alfa>  
 Chop [https://en.cellsignal.de/products/primary-antibodies/chop-l63f7-mouse-mab/2895?site-searchtype=Products&N=4294956287&Ntt=2895t&fromPage=plp&\\_requestid=2307582](https://en.cellsignal.de/products/primary-antibodies/chop-l63f7-mouse-mab/2895?site-searchtype=Products&N=4294956287&Ntt=2895t&fromPage=plp&_requestid=2307582)  
 Flag <https://www.sigmaaldrich.com/DE/de/product/sigma/f7425>  
 HA <https://www.biolegend.com/en-us/products/purified-anti-ha-11-epitope-tag-antibody-11374>  
 PITRM1 <https://www.ptglab.com/products/PITRM1-Antibody-10101-2-AP.htm>  
 CLUH / eIF3X [https://www.novusbio.com/products/eif3x-antibody\\_nb100-93306](https://www.novusbio.com/products/eif3x-antibody_nb100-93306)  
 PMPCB <https://www.ptglab.com/products/PMPCB-Antibody-16064-1-AP.htm>  
 OMA1 [https://en.cellsignal.de/products/primary-antibodies/oma1-d4j7k-rabbit-mab/95473?site-searchtype=Products&N=4294956287&Ntt=95473s&fromPage=plp&\\_requestid=2310100](https://en.cellsignal.de/products/primary-antibodies/oma1-d4j7k-rabbit-mab/95473?site-searchtype=Products&N=4294956287&Ntt=95473s&fromPage=plp&_requestid=2310100)  
 EIF2AK1 <https://www.ptglab.com/products/EIF2AK1-Antibody-20499-1-AP.htm>  
 alpha Tubulin <https://www.ptglab.com/products/tubulin-Alpha-Antibody-66031-1-Ig.htm>  
 Smac/Diablo <https://en.cellsignal.de/products/primary-antibodies/smac-diablo-d5s3r-rabbit-mab/15108>  
 HSPD1 <https://en.cellsignal.de/products/primary-antibodies/hsp60-d6f1-xp-rabbit-mab/12165>  
 mNEON <https://www.chromotek.com/products/detail/product-detail/mneongreen-antibody-32f6/>  
 TRAP1 <https://en.cellsignal.de/products/primary-antibodies/trap1-hsp75-d3d7n-rabbit-mab/92345>  
 TIM23 <https://www.scbt.com/p/tim23-antibody-h-8>  
 TOM40 <https://www.ptglab.com/products/TOMM40-Antibody-18409-1-AP.htm>  
 TOM20 <https://www.scbt.com/de/p/tom20-antibody-f-10?requestFrom=search>  
 β-actin-HRP (ACTB) <https://www.scbt.com/p/beta-actin-antibody-c4?requestFrom=search>  
 GAPDH <https://www.ptglab.com/products/GAPDH-Antibody-60004-1-Ig.htm>  
 mCherry <https://www.ptglab.com/products/mCherry-Antibody-26765-1-AP.htm>

## Eukaryotic cell lines

### Policy information about cell lines

|                                                                   |                                                                                                                                                                                                                                |
|-------------------------------------------------------------------|--------------------------------------------------------------------------------------------------------------------------------------------------------------------------------------------------------------------------------|
| Cell line source(s)                                               | Cells lines obtained from authenticated stocks were a kind gift from the Brummelkamp laboratory (HEK293T, HeLa; obtained from ATCC). HAP1 cell line was generated in the Brummelkamp laboratory (Carette et al., Nature 2011). |
| Authentication                                                    | Purchased cell lines were authenticated by source. During cultivation, cell lines were authenticated by monitoring phenotypic features, such as morphology and growth characteristics.                                         |
| Mycoplasma contamination                                          | All cell lines tested negative for mycoplasma.                                                                                                                                                                                 |
| Commonly misidentified lines (See <a href="#">ICLAC</a> register) | No commonly misidentified cell lines were used in this study.                                                                                                                                                                  |

## Plots

Confirm that:

- The axis labels state the marker and fluorochrome used (e.g. CD4-FITC).
- The axis scales are clearly visible. Include numbers along axes only for bottom left plot of group (a 'group' is an analysis of identical markers).
- All plots are contour plots with outliers or pseudocolor plots.
- A numerical value for number of cells or percentage (with statistics) is provided.

## Methodology

Sample preparation

Cells were acquired and cultured according to Methods section. Before analysis, cells were trypsinized, homogenized and vortexed.

Instrument

BD LSRFortessa (BD, Franklin Lakes, New Jersey, USA), BD Fusion

Software

Data were analyzed using BD FACSDiva (BD, Franklin Lakes, New Jersey, USA) or FlowJo software (TreeStar Inc, Ashland, Oregon, USA).

Cell population abundance

The gates used for sorting were set to top 4% DELE1-ALFA high and bottom 4% DELE1-ALFA low. Supplementary Figure 1a details the gating strategy and cell population abundance.

Gating strategy

For analytical flow cytometry or sorting of living cells, cells were first gated on FSC-A vs SSC-A to exclude debris. Subsequently, single cells were gated using the FSC-H vs FSC-W blot. Single cells were analyzed for fluorescence. Cell sorting of fixed cells for mutation mapping: cells were identified using the FCS-A vs SSC-A blot to exclude debris. Subsequently, single cells were identified using DAPI-A vs DAPI-W blot. Single cells were displayed in a histogram, on which gating on 1n DNA content was performed to exclude diploid cells. Sorting was performed on the haploid cell population, the gates used for sorting were set to top 4% DELE1-ALFA high and bottom 4% DELE1-ALFA low.

- Tick this box to confirm that a figure exemplifying the gating strategy is provided in the Supplementary Information.
